# Supplementary material
Source: PubMed Central journal article supplement (PMC5599254)
Supplement: NIHMS904888-supplement-Supplemental_Table_1.pdf [file NIHMS904888-supplement-Supplemental_Table_1.pdf]

**Supplementary Table 1** List of DNA sequences used for knock-in cell line creation.

| <b>Locus</b>  | <b>sgRNA guide sequence</b> | <b>Donor DNA</b>                                                                                                                                                                                                                                                                                                                                                                                                                                                                                               |
|---------------|-----------------------------|----------------------------------------------------------------------------------------------------------------------------------------------------------------------------------------------------------------------------------------------------------------------------------------------------------------------------------------------------------------------------------------------------------------------------------------------------------------------------------------------------------------|
| <b>Sec61B</b> | CTTGTCTCCCTCTAC<br>AGCC     | GGTTGGTTTTTGTCTCACCGTTGGTGTCCGTG<br>CCG TTCAGTTGCCCGCCATGGCGCATATTGTG<br>ATGGTGGATGCGTATAAACCGACCAAAGGTG<br>GCCGTGACCACATGGTCCTTCATGAGTATGTA<br>AATGCTGCTGGGATTACAGGTGGCGCTGAGC<br>TGGATCCGTTCCGGCGCCCCTGCCGGCGCCCCT<br>GGCGGTCCCCG                                                                                                                                                                                                                                                                            |
| <b>Rab11</b>  | GTAGTCGTA CTGTC<br>GTCG     | TCCACAGATA CCACTGCTGCTCCCGCCCTTT<br>CGCTCCTCGGCCGCGCAATGGCGCATATTGT<br>GATGGTGGATGCGTATAAACCGACCAAAGGT<br>GGCCGTGACCACATGGTCCTTCATGAGTATGT<br>AAATGCTGCTGGGATTACAGGTGGCGGCACA<br>CGGGACGACGAGTACGACTACCTCTTTAAAG<br>GTGAGGCCATGG                                                                                                                                                                                                                                                                               |
| <b>CLTA</b>   | GCCATGGCGGGCAAC<br>TGAA     | <b>SPY:</b><br>GGTTGGTTTTTGTCTCACCGTTGGTGTCCGTG<br>CCG TTCAGTTGCCCGCCATGGCGCATATTGTG<br>ATGGTGGATGCGTATAAACCGACCAAAGGTG<br>GCCGTGACCACATGGTCCTTCATGAGTATGTA<br>AATGCTGCTGGGATTACAGGTGGCGCTGAGC<br>TGGATCCGTTCCGGCGCCCCTGCCGGCGCCCCT<br>GGCGGTCCCCG<br><br><b>FLAG:</b><br>GGTCGGTTGGTTTTTGTCTCACCGTTGGTGTGTC<br>CGTGCCGTT CAGTTGCCCGCCATGGACTACA<br>AAGACGATGACGACAAGGGTGGCCGTGACCA<br>CATGGTCCTTCATGAGTATGTA AATGCTGCTG<br>GGATTACAGGTGGCGCTGAGCTGGATCCGTT<br>CGGCGCCCCTGCCGGCGCCCCTGGCGGTCCC<br>GCGCTGGGGAAC |
